# Supplementary material for: Decoding Immuno-Competence: A Novel Analysis of Complete Blood Cell Count Data in COVID-19 Outcomes
Source: MDPI journal article supplement (doi:10.3390/biomedicines12040871), 2024-04-15
Supplement: s1 [file s1]

**Table S1**

| <b>Table S1. Longitudinal assessments of 101 COVID-19 patients (n=291)</b> |      |     |          |      |      |        |      |     |         |    |       |      |            |          |            |                     |
|----------------------------------------------------------------------------|------|-----|----------|------|------|--------|------|-----|---------|----|-------|------|------------|----------|------------|---------------------|
| Obs                                                                        | ID # | Day | Outcome  | PCT  | IL-6 | Ferrit | C-RP | LDH | D-Dimer | Hb | Hemat | WBC  | Neutrophil | Monocyte | Lymphocyte | Protective profiles |
| 1                                                                          | 1    | 1   | Survivor | 0.36 | 22   | 747    | 202  | 355 | 923     | 13 | 37.6  | 8.1  | 81.4       | 7.0      | 11.5       | Other               |
| 2                                                                          | 1    | 2   | Survivor | 0.31 | 22   | 832    | 139  | 383 | 723     | 14 | 40.6  | 8.3  | 83.6       | 8.0      | 8.2        | Other               |
| 3                                                                          | 1    | 3   | Survivor | 0.27 | 10   | 717    | 74   | 347 | 631     | 13 | 35.9  | 11.4 | 86.5       | 5.8      | 7.5        | Other               |
| 4                                                                          | 1    | 4   | Survivor | 0.18 | 0    | 1019   | 73   | 413 | 3989    | 12 | 34.4  | 11.4 | 88.4       | 4.4      | 7.1        | Other               |
| 5                                                                          | 1    | 5   | Survivor | 0.07 | 0    | 656    | 7    | 248 | 1204    | 12 | 34.2  | 12.9 | 91.4       | 3.2      | 5.2        | Other               |
| 6                                                                          | 2    | 1   | Survivor | 0.07 | 36   | 485    | 71   | 122 | 265     | 14 | 42.0  | 6.5  | 71.7       | 12.1     | 16.1       | Other               |
| 7                                                                          | 2    | 2   | Survivor | 0.07 | 10   | 730    | 156  | 124 | 220     | 13 | 40.0  | 6.3  | 57.4       | 6.9      | 35.5       | Other               |
| 8                                                                          | 2    | 3   | Survivor | 0.07 | 0    | 601    | 146  | 179 | 410     | 15 | 43.8  | 15.3 | 57.4       | 6.9      | 35.5       | Other               |
| 9                                                                          | 3    | 1   | Survivor | 0.39 | 27   | 833    | 153  | 317 | 395     | 14 | 44.3  | 13.2 | 93.3       | 4.1      | 2.5        | Other               |
| 10                                                                         | 3    | 2   | Survivor | 0.26 | 7    | 833    | 172  | 313 | 471     | 13 | 40.4  | 10.9 | 93.5       | 2.3      | 4.1        | II                  |
| 11                                                                         | 3    | 3   | Survivor | 0.17 | 8    | *      | 73   | 321 | 743     | 13 | 40.2  | 12.1 | 88.4       | 6.0      | 5.4        | Other               |
| 12                                                                         | 4    | 1   | Survivor | 0.16 | 7    | 530    | 229  | 535 | 1337    | 13 | 42.6  | 7.2  | 83.9       | 4.3      | 11.7       | Other               |
| 13                                                                         | 4    | 2   | Survivor | 0.13 | 9    | 506    | 119  | 755 | 1253    | 12 | 40.2  | 6.0  | 83.4       | 4.0      | 12.5       | Other               |
| 14                                                                         | 4    | 3   | Survivor | 0.13 | 61   | 421    | 86   | 425 | 1237    | 13 | 42.0  | 8.9  | 84.9       | 5.9      | 9.0        | Other               |
| 15                                                                         | 4    | 4   | Survivor | 0.10 | *    | 332    | 83   | 395 | 1576    | 12 | 42.0  | 8.9  | 78.5       | 6.4      | 14.9       | Other               |
| 16                                                                         | 5    | 1   | Survivor | 0.10 | 82   | 2961   | 118  | 451 | 1201    | 14 | 41.8  | 7.9  | 79.5       | 11.7     | 8.7        | Other               |
| 17                                                                         | 5    | 2   | Survivor | 0.10 | 82   | 2642   | 118  | 364 | 798     | 14 | 40.9  | 6.8  | 76.4       | 11.7     | 11.7       | Other               |
| 18                                                                         | 5    | 3   | Survivor | 0.10 | 40   | 1183   | 135  | 272 | 546     | 11 | 35.3  | 7.3  | 76.1       | 12.1     | 11.7       | Other               |
| 19                                                                         | 6    | 1   | Survivor | 0.30 | 314  | 1078   | 108  | 277 | 1019    | 16 | 47.6  | 9.0  | 88.0       | 4.8      | 7.0        | Other               |
| 20                                                                         | 6    | 2   | Survivor | 0.33 | 314  | 1311   | 168  | 277 | 678     | 13 | 42.9  | 5.5  | 87.6       | 5.8      | 6.4        | Other               |
| 21                                                                         | 6    | 3   | Survivor | 0.28 | 380  | 1151   | 109  | 382 | 783     | 14 | 42.6  | 6.3  | 82.7       | 8.5      | 8.7        | Other               |
| 22                                                                         | 6    | 4   | Survivor | 0.20 | 6    | 693    | 8    | 170 | 561     | 13 | 39.4  | 6.3  | 69.1       | 11.1     | 19.6       | Other               |
| 23                                                                         | 7    | 1   | Survivor | 0.09 | 18   | 175    | 9    | 336 | 672     | 13 | 40.0  | 5.4  | 65.9       | 15.4     | 18.6       | Other               |
| 24                                                                         | 7    | 2   | Survivor | 0.09 | 18   | 175    | 9    | 336 | 672     | 12 | 37.5  | 4.6  | 69.5       | 15.6     | 14.8       | Other               |
| 25                                                                         | 7    | 3   | Survivor | 0.09 | 18   | 126    | 6    | 205 | 539     | 10 | 31.6  | 2.6  | 52.3       | 25.8     | 21.8       | Other               |
| 26                                                                         | 8    | 1   | Survivor | 0.11 | 30   | 339    | 83   | 297 | 504     | 10 | 36.9  | 4.5  | 57.2       | 8.7      | 33.9       | Other               |
| 27                                                                         | 8    | 2   | Survivor | 0.13 | *    | 547    | 122  | 262 | 484     | 11 | 33.1  | 9.1  | 79.6       | 8.5      | 11.8       | Other               |
| 28                                                                         | 8    | 3   | Survivor | *    | *    | *      | *    | *   | *       | 11 | 34.9  | 9.8  | 82.9       | 7.5      | 9.4        | Other               |
| 29                                                                         | 9    | 1   | Survivor | *    | 24   | 1500   | 4    | 258 | 228     | 15 | 44.4  | 7.7  | 70.4       | 12.7     | 16.8       | Other               |
| 30                                                                         | 9    | 2   | Survivor | 0.06 | 24   | 1442   | 6    | 261 | 282     | 13 | 40.3  | 5.2  | 55.8       | 10.7     | 33.3       | Other               |
| 31                                                                         | 9    | 3   | Survivor | 0.06 | *    | 1878   | 10   | 306 | 277     | 13 | 41.5  | 6.3  | 58.2       | 13.5     | 28.1       | Other               |
| 32                                                                         | 10   | 1   | Survivor | 0.13 | 26   | 53     | 5    | 212 | 404     | 8  | 27.2  | 8.9  | 85.6       | 8.1      | 6.2        | Other               |
| 33                                                                         | 10   | 2   | Survivor | 0.13 | 26   | 53     | 5    | 212 | 404     | 7  | 24.7  | 7.7  | 92.2       | 3.0      | 4.7        | Other               |
| 34                                                                         | 10   | 3   | Survivor | 0.13 | 26   | 55     | 7    | 249 | 650     | 7  | 24.7  | 8.1  | 87.7       | 8.5      | 3.7        | Other               |
| 35                                                                         | 10   | 4   | Survivor | *    | *    | 21     | *    | 255 | 703     | 7  | 22.6  | 11.4 | 85.6       | 9.7      | 4.6        | Other               |
| 36                                                                         | 11   | 1   | Survivor | 0.07 | 11   | 328    | 11   | 161 | 220     | 14 | 42.7  | 6.7  | 78.0       | 10.3     | 11.6       | Other               |
| 37                                                                         | 11   | 2   | Survivor | 0.06 | 11   | 363    | 7    | 163 | *       | 14 | 44.2  | 7.4  | 71.6       | 10.4     | 17.9       | Other               |
| 38                                                                         | 11   | 3   | Survivor | 0.06 | *    | 363    | 7    | 163 | *       | 14 | 44.0  | 7.1  | 71.7       | 8.4      | 19.7       | Other               |
| 39                                                                         | 12   | 1   | Survivor | *    | 33   | 115    | 11   | 194 | 979     | 7  | 24.6  | 4.0  | 42.5       | 20.5     | 36.8       | III                 |
| 40                                                                         | 12   | 2   | Survivor | *    | 33   | 115    | 11   | 194 | 1341    | 7  | 24.6  | 4.0  | 42.5       | 20.5     | 36.8       | III                 |
| 41                                                                         | 12   | 3   | Survivor | *    | 33   | 199    | 20   | 213 | 844     | 7  | 24.3  | 3.5  | 46.3       | 17.4     | 36         | III                 |
| 42                                                                         | 13   | 1   | Survivor | 0.14 | 43   | 38     | 133  | 236 | 917     | 9  | 29.1  | 7.6  | 69.5       | 13.0     | 17.3       | Other               |
| 43                                                                         | 13   | 2   | Survivor | 0.14 | 43   | 38     | 133  | 236 | 917     | 8  | 29.1  | 4.3  | 43.0       | 15.3     | 41.5       | III                 |
| 44                                                                         | 13   | 3   | Survivor | 0.16 | *    | 47     | 82   | 194 | 746     | 8  | 27.1  | 6.0  | 47.4       | 13.2     | 39.3       | III                 |
| 45                                                                         | 14   | 1   | Survivor | 0.11 | 24   | 788    | 12   | 242 | 285     | 14 | 43.0  | 6.0  | 76.7       | 7.2      | 16.0       | Other               |
| 46                                                                         | 14   | 2   | Survivor | 0.11 | 24   | 788    | 242  | 114 | 285     | 13 | 38.7  | 5.0  | 71.0       | 8.6      | 20.3       | Other               |
| 47                                                                         | 14   | 3   | Survivor | 0.11 | 24   | 779    | 10   | 255 | 249     | 13 | 40.6  | 4.4  | 48.7       | 13.2     | 37.9       | III                 |
| 48                                                                         | 15   | 1   | Survivor | 0.13 | 53   | 154    | 203  | 21  | 1926    | 12 | 36.9  | 4.4  | 63.4       | 15.1     | 21.3       | Other               |
| 49                                                                         | 15   | 2   | Survivor | 0.13 | 53   | 154    | 203  | 22  | 1926    | 11 | 35.7  | 4.0  | 55.7       | 20.9     | 23.2       | Other               |
| 50                                                                         | 15   | 3   | Survivor | 0.13 | 212  | 153    | 203  | 22  | 1211    | 11 | 36.2  | 5.1  | 60.4       | 19.2     | 20.3       | Other               |

Table S1 - cont'd

| Obs | ID # | Day | Outcome      | PCT   | IL-6 | Ferritin | C-RP | LDH  | D-Dimer | Hb | Hemat | WBC   | Neutrophil | Monocyte | Lymphocyte | Protective profiles |
|-----|------|-----|--------------|-------|------|----------|------|------|---------|----|-------|-------|------------|----------|------------|---------------------|
| 51  | 16   | 1   | Survivor     | 25.42 | 3543 | 1404     | 104  | 340  | 574     | 16 | 47    | 4.40  | 89.8       | 3.1      | 7.0        | Other               |
| 52  | 16   | 2   | Survivor     | 18.57 | 37   | 1764     | 174  | 404  | 326     | 16 | 48    | 8.90  | 85.1       | 2.7      | 12.0       | Other               |
| 53  | 16   | 3   | Survivor     | 12.38 | 17   | 1139     | 132  | 415  | 422     | 15 | 46    | 8.90  | 92.8       | 2.8      | 4.3        | II                  |
| 54  | 17   | 1   | Survivor     | 0.07  | 23   | 470      | 10   | 283  | 505     | 13 | 42    | 3.60  | 89.9       | 2.7      | 7.3        | Other               |
| 55  | 17   | 2   | Survivor     | 0.07  | 25   | 562      | 13   | 264  | 382     | 13 | 42    | 3.90  | 86.2       | 4.6      | 9.0        | Other               |
| 56  | 17   | 3   | Survivor     | 0.07  | 25   | 837      | 43   | 346  | 419     | 12 | 39    | 4.10  | 77.7       | 4.9      | 17.3       | Other               |
| 57  | 18   | 1   | Non-survivor | 0.16  | 332  | 675      | 85   | 573  | 873     | 13 | 41    | 4.90  | 72.3       | 6.1      | 21.4       | Other               |
| 58  | 18   | 2   | Non-survivor | 0.16  | 332  | 833      | 106  | 573  | 844     | 14 | 44    | 5.60  | 65.7       | 9.6      | 24.6       | Other               |
| 59  | 18   | 3   | Non-survivor | 0.00  | 0    | 673      | 70   | 855  | 928     | 12 | 37    | 7.60  | 75.8       | 6.4      | 17.7       | Other               |
| 60  | 19   | 1   | Non-survivor | 0.22  | 39   | 534      | 92   | 1102 | 13932   | 12 | 37    | 11.10 | 66.1       | 8.1      | 25.7       | Other               |
| 61  | 19   | 2   | Non-survivor | 0.20  | 39   | 543      | 141  | 1111 | 6997    | 11 | 35    | 7.40  | 67.8       | 7.8      | 24.2       | Other               |
| 62  | 19   | 3   | Non-survivor | 0.22  | 4500 | 645      | 289  | 834  | 3230    | 12 | 37    | 8.40  | 86.2       | 4.6      | 9.1        | Other               |
| 63  | 19   | 4   | Non-survivor | 0.63  | 0    | 563      | 22   | 829  | 4283    | 11 | 33    | 14.00 | 86.0       | 5.8      | 8.0        | Other               |
| 64  | 19   | 5   | Non-survivor | 0.37  | 0    | 0        | 35   | 344  | 6327    | 10 | 31    | 13.80 | 83.6       | 7.5      | 8.8        | Other               |
| 65  | 20   | 1   | Non-survivor | 0.13  | 481  | 385      | *    | 341  | 2414    | 12 | 37    | 13.80 | 90.2       | 1.9      | 7.8        | Other               |
| 66  | 20   | 2   | Non-survivor | 2.05  | 481  | 428      | *    | 299  | 3850    | 11 | 36    | 12.10 | 85.9       | 3.6      | 10.4       | Other               |
| 67  | 20   | 3   | Non-survivor | 2.05  | 0    | 852      | 375  | 484  | 3836    | 11 | 35    | 12.80 | 85.7       | 5.3      | 8.9        | Other               |
| 68  | 20   | 4   | Non-survivor | 0.00  | 0    | 745      | 169  | 319  | 32908   | 10 | 30    | 13.00 | 84.8       | 8.3      | 6.8        | Other               |
| 69  | 21   | 1   | Non-survivor | 0.64  | 462  | 2166     | 204  | 755  | 667     | 14 | 42    | 7.60  | 80.5       | 7.4      | 11.9       | II                  |
| 70  | 21   | 2   | Non-survivor | 0.00  | 525  | 3068     | 124  | 971  | 489     | 11 | 35    | 11.70 | 78.3       | 9.1      | 12.5       | Other               |
| 71  | 22   | 1   | Survivor     | 1.12  | 282  | 1403     | 278  | 423  | 1260    | 13 | 41    | 8.60  | 51.2       | 9.4      | 39.2       | II                  |
| 72  | 22   | 2   | Survivor     | 0.75  | 300  | 1779     | 324  | 552  | 1156    | 14 | 41    | 7.70  | 44.3       | 10.1     | 45.5       | Other               |
| 73  | 22   | 3   | Survivor     | 0.25  | 265  | 1797     | 292  | 477  | 2199    | 13 | 39    | 7.40  | 47.9       | 6.7      | 45.3       | Other               |
| 74  | 23   | 1   | Non-survivor | 1.21  | 20   | 149      | 81   | 286  | 1829    | 9  | 28    | 13.70 | 44.6       | 12.6     | 42.6       | Other               |
| 75  | 23   | 2   | Non-survivor | 0.00  | 0    | 113      | 65   | 268  | 1672    | 7  | 23    | 13.80 | 52.6       | 7.5      | 39         | Other               |
| 76  | 23   | 3   | Non-survivor | 0.00  | 0    | 257      | 54   | 207  | 3709    | 8  | 26    | 15.40 | 51.0       | 9.0      | 39.9       | Other               |
| 77  | 24   | 1   | Non-survivor | 0.36  | 128  | 2868     | 138  | 350  | 367     | 15 | 46    | 9.20  | 65.5       | 9.7      | 24.6       | Other               |
| 78  | 24   | 2   | Non-survivor | 0.26  | 154  | 2691     | 164  | 420  | 393     | 14 | 42    | 9.30  | 75.2       | 5.6      | 19.1       | Other               |
| 79  | 24   | 3   | Non-survivor | 0.18  | *    | 2588     | 82   | 425  | 390     | 14 | 43    | 9.00  | 76.9       | 6.6      | 16.3       | Other               |
| 80  | 25   | 1   | Survivor     | 0.18  | 154  | 448      | 4    | 488  | 5012    | 12 | 36    | 8.20  | 60.5       | 6.4      | 33.0       | Other               |
| 81  | 25   | 2   | Survivor     | 0.17  | 103  | 376      | 3    | 398  | 4919    | 12 | 37    | 7.10  | 87.9       | 4.2      | 7.8        | Other               |
| 82  | 25   | 3   | Survivor     | 0.17  | 55   | 95       | 7    | 302  | 2237    | 12 | 36    | 9.00  | 70.8       | 5.9      | 23.2       | Other               |
| 83  | 26   | 1   | Survivor     | 0.09  | 53   | 271      | 113  | 313  | 1146    | 11 | 35    | 8.30  | 78.3       | 7.6      | 13.9       | Other               |
| 84  | 26   | 2   | Survivor     | 0.08  | 3    | 230      | 110  | 281  | 1038    | 12 | 36    | 5.60  | 66.0       | 11.0     | 22.8       | Other               |
| 85  | 26   | 3   | Survivor     | 0.07  | 0    | 280      | 45   | 270  | 1427    | 12 | 37    | 3.80  | 67.5       | 10.6     | 21.8       | Other               |
| 86  | 27   | 1   | Survivor     | 0.91  | 175  | 1001     | 245  | 617  | 1972    | 13 | 42    | 14.40 | 63.7       | 11.0     | 25.1       | II                  |
| 87  | 27   | 2   | Survivor     | 0.27  | 3620 | 725      | 214  | 556  | 2132    | 10 | 33    | 12.80 | 84.6       | 3.1      | 12.2       | II                  |
| 88  | 27   | 3   | Survivor     | 0.16  | 880  | 1845     | 206  | 623  | 3264    | 12 | 37    | 14.60 | 64.5       | 12.4     | 23.0       | Other               |
| 89  | 28   | 1   | Survivor     | 0.08  | 43   | 245      | 32   | 291  | 736     | 13 | 39    | 5.10  | 66.5       | 10.8     | 22.6       | Other               |
| 90  | 28   | 2   | Survivor     | 0.00  | 0    | 226      | 35   | 238  | 361     | 11 | 34    | 4.30  | 81.8       | 10.7     | 7.3        | III                 |
| 91  | 29   | 1   | Survivor     | 0.35  | 12   | 945      | 92   | 575  | 487     | 14 | 42    | 5.40  | 87.0       | 5.7      | 7.2        | Other               |
| 92  | 29   | 2   | Survivor     | 0.31  | 4    | 925      | 102  | 459  | 486     | 14 | 40    | 6.20  | 87.1       | 6.5      | 6.2        | Other               |
| 93  | 29   | 3   | Survivor     | 0.23  | 0    | 938      | 80   | 336  | 836     | 13 | 39    | 4.60  | 76.8       | 5.9      | 17.1       | Other               |
| 94  | 30   | 1   | Survivor     | 0.15  | 50   | 81       | 90   | 420  | 884     | 12 | 40    | 9.20  | 63.9       | 10.6     | 25.4       | Other               |
| 95  | 30   | 2   | Survivor     | 0.12  | 157  | 79       | 101  | 451  | 779     | 12 | 39    | 5.40  | 64.5       | 9.3      | 26.1       | Other               |
| 96  | 30   | 3   | Survivor     | 0.31  | 756  | 110      | 68   | 629  | 858     | 11 | 36    | 6.50  | 75.3       | 6.8      | 17.8       | Other               |
| 97  | 31   | 1   | Non-survivor | 0.01  | 72   | 996      | 99   | 733  | 699     | 15 | 46    | 6.50  | 74.6       | 6.4      | 18.8       | Other               |
| 98  | 31   | 2   | Non-survivor | 0.08  | 431  | 744      | 96   | 756  | 895     | 14 | 44    | 3.40  | 65.6       | 5.6      | 28.6       | Other               |
| 99  | 31   | 3   | Non-survivor | 0.00  | 4500 | 696      | 46   | 889  | 992     | 15 | 47    | 14.60 | 59.0       | 6.9      | 34.0       | Other               |
| 100 | 32   | 1   | Survivor     | 0.45  | 221  | 253      | 173  | 223  | 1066    | 13 | 39    | 10.50 | 67.3       | 7.5      | 25.1       | Other               |

**Table S1 - cont'd**

| Obs | ID # | Day | Outcome  | PCT  | IL-6 | Ferritin | C-RP | LDH | D-Dimer | Hb  | Hemat | WBC  | Neutrophil | Monocyte | Lymphocyte | Protective profiles |
|-----|------|-----|----------|------|------|----------|------|-----|---------|-----|-------|------|------------|----------|------------|---------------------|
| 101 | 32   | 2   | Survivor | 0.74 | 171  | 295      | 175  | 245 | 1356    | 12  | 36    | 10.5 | 89.8       | 3.1      | 7.0        | Other               |
| 102 | 32   | 3   | Survivor | 3.21 | 220  | 737      | 199  | 391 | 890     | 12  | 37    | 8.5  | 85.1       | 2.7      | 12.0       | Other               |
| 103 | 33   | 1   | Survivor | 0.38 | 69   | 997      | 144  | 549 | 615     | 13  | 373   | 9.4  | 92.8       | 2.8      | 4.3        | Other               |
| 104 | 33   | 2   | Survivor | 0.33 | 69   | 1058     | 141  | 392 | 503     | 12  | 35    | 5.9  | 89.9       | 2.7      | 7.3        | Other               |
| 105 | 33   | 3   | Survivor | 0.07 | 69   | 567      | 68   | 319 | 562     | 12  | 3     | 8.3  | 86.2       | 4.6      | 9.0        | Other               |
| 106 | 34   | 1   | Survivor | 0.41 | 40   | 518      | 118  | 367 | 329     | 14  | 41    | 5.6  | 77.7       | 4.9      | 17.3       | Other               |
| 107 | 34   | 2   | Survivor | 0.30 | 16   | 496      | 116  | 352 | 287     | 13  | 40    | 5.7  | 72.3       | 6.1      | 21.4       | Other               |
| 108 | 34   | 3   | Survivor | 0.30 | 16   | 537      | 127  | 357 | 338     | 13  | 40    | 4.1  | 65.7       | 9.6      | 24.6       | Other               |
| 109 | 35   | 1   | Survivor | 4.56 | 15   | 110      | 58   | 325 | 708     | 10  | 32    | 4.1  | 75.8       | 6.4      | 17.7       | Other               |
| 110 | 35   | 2   | Survivor | 0.46 | 15   | 92       | 56   | 389 | 708     | 10  | 3     | 6.0  | 66.1       | 8.1      | 25.7       | Other               |
| 111 | 35   | 3   | Survivor | 0.21 | 15   | 72       | 28   | 368 | 708     | 10  | 32    | 7.9  | 67.8       | 7.8      | 24.2       | Other               |
| 112 | 36   | 1   | Survivor | 1.52 | 857  | 545      | 171  | 749 | 522     | 14  | 42    | 5.7  | 86.2       | 4.6      | 9.1        | Other               |
| 113 | 36   | 2   | Survivor | 1.36 | 182  | 592      | 196  | 840 | 329     | 14  | 46    | 5.1  | 86.0       | 5.8      | 8.0        | Other               |
| 114 | 36   | 3   | Survivor | 0.22 | 24   | 630      | 137  | 649 | 340     | 13  | 40    | 4.7  | 83.6       | 7.       | 8.8        | Other               |
| 115 | 37   | 1   | Survivor | 0.23 | 322  | 1957     | 125  | 658 | 975     | 13  | 41    | 6.9  | 90.2       | 1.9      | 7.8        | II                  |
| 116 | 37   | 2   | Survivor | 0.42 | 91   | 1778     | 186  | 715 | 707     | 12  | 38    | 7.3  | 85.9       | 3.6      | 10.4       | Other               |
| 117 | 37   | 3   | Survivor | 0.30 | 16   | 1828     | 113  | 608 | 787     | 12  | 38    | 8.0  | 85.7       | 5.3      | 8.9        | Other               |
| 118 | 38   | 1   | Survivor | 0.14 | 54   | 617      | 103  | 493 | 432     | 13  | 40    | 9.5  | 84.8       | 8.3      | 6.8        | Other               |
| 119 | 38   | 2   | Survivor | 0.06 | 111  | 460      | 85   | 419 | 409     | 13  | 39    | 6.2  | 80.5       | 7.4      | 11.9       | Other               |
| 120 | 38   | 3   | Survivor | 0.00 | 8    | 464      | 50   | 397 | 471     | 13  | 70    | 7.0  | 78.3       | 9.1      | 12.5       | Other               |
| 121 | 39   | 1   | Survivor | 0.00 | 5    | 39       | 0    | 227 | 5943    | 13  | 41    | 5.4  | 51.2       | 9.4      | 39.2       | III                 |
| 122 | 39   | 2   | Survivor | 0.00 | 5    | 185      | 3    | 252 | 4820    | 13  | 41    | 5.1  | 44.3       | 10.1     | 45.5       | III                 |
| 123 | 39   | 3   | Survivor | 0.00 | 5    | 249      | 4    | 258 | 1429    | 13  | 41    | 4.9  | 47.9       | 6.7      | 45.3       | III                 |
| 124 | 40   | 1   | Survivor | 0.06 | 24   | 59       | 6    | 229 | 3449    | 11  | 36    | 1.5  | 44.6       | 12.6     | 42.6       | III                 |
| 125 | 40   | 2   | Survivor | 0.06 | 21   | 66       | 7    | 213 | 240     | 11  | 35    | 2.4  | 52.6       | 7.5      | 39.8       | III                 |
| 126 | 40   | 3   | Survivor | 0.06 | 20   | 73       | 5    | 292 | 380     | 12  | 39    | 2.5  | 51.0       | 9.0      | 39.9       | III                 |
| 127 | 41   | 1   | Survivor | *    | *    | *        | *    | *   | *       | 12  | 41    | 8.1  | 65.5       | 9.7      | 24.6       | Other               |
| 128 | 42   | 1   | Survivor | 0.07 | 8    | 168      | 26   | 159 | 1162    | 13  | 41    | 3.7  | 75.2       | 5.6      | 19.1       | Other               |
| 129 | 42   | 2   | Survivor | 0.08 | 17   | 215      | 28   | 154 | 1299    | 12  | 39    | 3.5  | 76.9       | 6.6      | 16.3       | Other               |
| 130 | 42   | 3   | Survivor | 0.00 | 6    | 226      | 30   | 189 | 872     | 12  | 40    | 2.8  | 60.5       | 6.4      | 33.0       | Other               |
| 131 | 43   | 1   | Survivor | 0.17 | 94   | 332      | 82   | 327 | 1031    | 12  | 39    | 8.1  | 87.9       | 4.2      | 7.8        | Other               |
| 132 | 43   | 2   | Survivor | 0.51 | 3    | 358      | 70   | 279 | 684     | 10  | 31    | 5.1  | 70.8       | 5.9      | 23.2       | Other               |
| 133 | 43   | 3   | Survivor | 0.23 | 0    | 473      | 52   | 359 | 534     | 11  | 35    | 7.2  | 78.3       | 7.6      | 13.9       | Other               |
| 134 | 44   | 1   | Survivor | 0.06 | 17   | 13       | 11   | 330 | 429     | 9   | 31    | 5.5  | 66.0       | 11.0     | 22.8       | Other               |
| 135 | 44   | 2   | Survivor | 0.07 | 17   | 13       | 7    | 240 | 404     | 8   | 31    | 5.5  | 67.5       | 10.6     | 21.8       | Other               |
| 136 | 44   | 3   | Survivor | 0.07 | 17   | 13       | 5    | 200 | 475     | 9   | 32    | 7.9  | 63.7       | 11.0     | 25.1       | Other               |
| 137 | 45   | 1   | Survivor | 0.20 | 87   | 638      | 205  | 290 | 481     | 13. | 41    | 10.1 | 84.6       | 3.1      | 12.2       | Other               |
| 138 | 45   | 2   | Survivor | 0.19 | 25   | 888      | 215  | 275 | 1652    | 13  | 41    | 4.0  | 64.5       | 12.4     | 23.0       | Other               |
| 139 | 45   | 3   | Survivor | 0.15 | 25   | 570      | 127  | 269 | 885     | 13  | 41    | 9.7  | 66.5       | 10.8     | 22.6       | Other               |
| 140 | 46   | 1   | Survivor | 0.11 | 106  | 746      | 88   | 476 | 3956    | 14  | 42    | 8.9  | 81.8       | 10.7     | 7.3        | Other               |
| 141 | 46   | 2   | Survivor | 0.07 | 106  | 631      | 87   | 459 | 3206    | 13  | 41    | 5.5  | 87.0       | 5.7      | 7.2        | Other               |
| 142 | 46   | 3   | Survivor | 0.06 | 106  | 556      | 27   | 372 | 1520    | 13  | 39    | 6.3  | 87.1       | 6.5      | 6.2        | Other               |
| 143 | 47   | 1   | Survivor | 0.17 | 30   | 344      | 83   | 461 | 554     | 14  | 36    | 6.8  | 76.8       | 5.9      | 17.1       | Other               |
| 144 | 47   | 2   | Survivor | 0.17 | 16   | 346      | 106  | 423 | 505     | 14  | 44    | 5.1  | 63.9       | 10.6     | 25.4       | Other               |
| 145 | 47   | 3   | Survivor | 0.17 | 7    | 347      | 57   | 330 | 531     | 14  | 45    | 6.3  | 64.5       | 9.3      | 26.1       | Other               |
| 146 | 48   | 1   | Survivor | 0.67 | 71   | 18       | 180  | 590 | 2066    | 13  | 42    | 7.1  | 75.3       | 6.8      | 17.8       | Other               |
| 147 | 48   | 2   | Survivor | 0.60 | 11   | 305      | 102  | 537 | 1137    | 12  | 38    | 6.5  | 74.6       | 6.4      | 18.8       | Other               |
| 148 | 48   | 3   | Survivor | 0.40 | 0    | 220      | 69   | 463 | 1571    | 12  | 37    | 6.5  | 65.6       | 5.6      | 28.6       | Other               |
| 149 | 49   | 1   | Survivor | 0.11 | *    | 108      | 6    | *   | 473     | 13  | 41    | 3.6  | 59.0       | 6.9      | 34.0       | Other               |
| 150 | 49   | 2   | Survivor | 0.08 | *    | 206      | 6    | *   | 280     | 13  | 38    | 11.7 | 67.3       | 7.5      | 25.1       | Other               |

**Table S1 - cont'd**

| Obs | ID # | Day | Outcome      | PCT  | IL-6 | Ferrit | C-RP | LDH | D-Dimer | Hb   | Hemat | WBC  | Neutrophil | Monocyte | Lymphocyte | Protective profiles |
|-----|------|-----|--------------|------|------|--------|------|-----|---------|------|-------|------|------------|----------|------------|---------------------|
| 151 | 50   | 1   | Survivor     | 0.08 | 53   | 621    | 46   | 355 | 803     | 15   | 44    | 10.7 | 86.2       | 7.1      | 6.5        | Other               |
| 152 | 50   | 2   | Survivor     | 0.00 | 53   | 651    | 88   | 334 | 624     | 14   | 41    | 6.2  | 71.3       | 10.9     | 17.6       | Other               |
| 153 | 50   | 3   | Survivor     | 0.00 | 53   | 616    | 54   | 317 | 520     | 14   | 45    | 4.7  | 75.5       | 9.1      | 15.3       | Other               |
| 154 | 51   | 1   | Survivor     | 0.06 | 7.70 | 87.00  | 28   | 366 | 491     | 14   | 43    | 2.3  | 79.5       | 3.9      | 16.5       | Other               |
| 155 | 51   | 2   | Survivor     | 0.07 | 82   | 114    | 22   | 326 | 453     | 13   | 40    | 4.1  | 73.9       | 5.1      | 20.9       | Other               |
| 156 | 51   | 3   | Survivor     | 0.07 | 7    | 92     | 22   | 320 | 333     | 12   | 37    | 3.6  | 86.9       | 4.7      | 8.3        | Other               |
| 157 | 52   | 1   | Survivor     | 0.27 | 35   | 855    | 92   | 318 | 800     | 14   | 42    | 8.1  | 84.5       | 6.2      | 9.1        | Other               |
| 158 | 52   | 2   | Survivor     | 0.20 | 5    | 765    | 42   | 401 | 997     | 14   | 42    | 5.9  | 81.7       | 6.9      | 11.2       | Other               |
| 159 | 52   | 3   | Survivor     | 0.15 | 5    | 886    | 101  | 419 | 1008    | 13   | 41    | 12.8 | 90.8       | 3.7      | 5.4        | Other               |
| 160 | 53   | 1   | Non-survivor | 0.76 | 97   | 948    | 208  | 429 | 845     | 11   | 35    | 4.9  | 91.3       | 2.4      | 6.1        | II                  |
| 161 | 53   | 2   | Non-survivor | 1.53 | 108  | 1223   | 133  | 418 | 1034    | 12   | 37    | 4.6  | 88.1       | 4.4      | 7.4        | Other               |
| 162 | 53   | 3   | Non-survivor | 1.41 | 108  | 834    | 91   | 459 | 1349    | 12   | 35    | 4.0  | 90.2       | 3.5      | 6.2        | Other               |
| 163 | 54   | 1   | Survivor     | 0.08 | 82   | 526    | 140  | 347 | 530     | 15   | 43    | 5.3  | 86.2       | 5.5      | 8.2        | Other               |
| 164 | 54   | 2   | Survivor     | 0.08 | 87   | 399    | 174  | 367 | 399     | 15   | 44    | 3.2  | 75.7       | 7.1      | 17.1       | Other               |
| 165 | 54   | 3   | Survivor     | 0.08 | 83   | 364    | 88   | 374 | 551     | 14   | 44    | 3.8  | 67.1       | 12.2     | 20.5       | Other               |
| 166 | 55   | 1   | Survivor     | 2.54 | 49   | 476    | 83   | 291 | 611     | 16   | 48    | 5.3  | 74.1       | 5.5      | 20.3       | Other               |
| 167 | 55   | 2   | Survivor     | 3.66 | 49   | 469    | 112  | 336 | 587     | 14   | 44    | 4.2  | 67.4       | 7.1      | 25.3       | Other               |
| 168 | 55   | 3   | Survivor     | 2.32 | 49   | 665    | 27   | 489 | 886     | 14   | 43    | 9.5  | 76.0       | 6.6      | 17.2       | Other               |
| 169 | 56   | 1   | Survivor     | 0.06 | 20   | 144    | 71   | 167 | 1204    | 10   | 36    | 9.5  | 73.3       | 7.5      | 19.0       | Other               |
| 170 | 56   | 2   | Survivor     | 0.06 | 20   | 107    | 59   | 167 | 1011    | 8    | 28    | 9.3  | 65.2       | 7.3      | 27.3       | Other               |
| 171 | 57   | 1   | Survivor     | 0.79 | 50   | 1143   | 15   | 0   | 1079    | 13   | 38    | 7.8  | 70.5       | 15.5     | 13.8       | Other               |
| 172 | 57   | 2   | Survivor     | 0.57 | 5    | 1400   | 58   | 0   | 1728    | 14   | 41    | 4.9  | 67.        | 14.4     | 18.1       | Other               |
| 173 | 57   | 3   | Survivor     | 0.06 | 537  | 1206   | 20   | 0   | 1095    | 13   | 37    | 11.3 | 80.4       | 10.0     | 9.4        | Other               |
| 174 | 58   | 1   | Survivor     | 0.22 | 38   | 1680   | 80   | 476 | 702     | 15   | 45    | 3.6  | 68.3       | 8.4      | 23.2       | Other               |
| 175 | 58   | 2   | Survivor     | 0.20 | 50   | 1467   | 84   | 618 | 667     | 15   | 45    | 3.9  | 57.6       | 9.6      | 32.6       | Other               |
| 176 | 58   | 3   | Survivor     | 0.20 | 38   | 979    | 69   | 410 | 392     | 14   | 44    | 4.0  | 56.7       | 11.0     | 32.1       | Other               |
| 177 | 59   | 1   | Survivor     | 0.81 | 90   | 676    | 174  | 244 | 2043    | 10   | 31    | 10.6 | 80.6       | 7.5      | 11.8       | Other               |
| 178 | 59   | 2   | Survivor     | 0.64 | 50   | 654    | 130  | 201 | 1774    | 10   | 31    | 7.2  | 71.1       | 11.3     | 17.5       | Other               |
| 179 | 59   | 3   | Survivor     | 0.40 | 45   | 821    | 11   | 210 | 2017    | 9    | 28    | 5.7  | 59.5       | 10.8     | 29.5       | Other               |
| 180 | 60   | 1   | Survivor     | 0.10 | 38   | 473    | 73   | 220 | 963     | 14   | 45    | 6.0  | 66.1       | 14.1     | 19.6       | Other               |
| 181 | 60   | 2   | Survivor     | 0.11 | 13   | 467    | 74   | 208 | 975     | 15   | 46    | 4.4  | 72.2       | 14.9     | 12.8       | Other               |
| 182 | 60   | 3   | Survivor     | 0.11 | 17   | 537    | 82   | 202 | 989     | 15   | 47    | 5.8  | 64.9       | 16.5     | 18.4       | Other               |
| 183 | 61   | 1   | Survivor     | 0.10 | 19   | 967    | 13   | 273 | 816     | 1436 | 43    | 5.5  | 68.3       | 11.9     | 19.7       | Other               |
| 184 | 61   | 2   | Survivor     | 0.15 | 5    | 760    | 16   | 264 | 737     | 14   | 42    | 5.8  | 65.4       | 11.9     | 22.5       | Other               |
| 185 | 61   | 3   | Survivor     | 0.00 | 5    | 614    | 12   | 28  | 939     | 15   | 45    | 5.7  | 60.4       | 12.6     | 26.8       | Other               |
| 186 | 62   | 1   | Survivor     | 0.06 | 7    | 69     | 60   | 489 | 747     | 10   | 36    | 4.9  | 64.0       | 12.5     | 23.4       | Other               |
| 187 | 62   | 2   | Survivor     | 0.06 | 9    | 51     | 28   | 308 | 503     | 11   | 36    | 5.7  | 63.2       | 12.5     | 24.2       | Other               |
| 188 | 62   | 3   | Survivor     | 0.06 | 6    | 34     | 18   | 276 | 335     | 11   | 37    | 8.8  | 74.2       | 9.2      | 16.4       | Other               |
| 189 | 64   | 1   | Survivor     | 0.06 | 3    | 357    | 15   | 173 | 711     | 15   | 46    | 5.7  | 84.4       | 14.4     | 1.         | I                   |
| 190 | 64   | 2   | Survivor     | 0.06 | 3    | 355    | 9    | 180 | 636     | 15   | 44    | 6.7  | 83.8       | 14.6     | 1.5        | I                   |
| 191 | 64   | 3   | Survivor     | 0.06 | 2    | 290    | 8    | 157 | 481     | 14   | 42    | 4.1  | 62.0       | 17.1     | 20.7       | Other               |
| 192 | 65   | 1   | Survivor     | 0.23 | 61   | 382    | 67   | 445 | 672     | 15   | 44    | 4.0  | 80.8       | 5.8      | 13.3       | Other               |
| 193 | 65   | 2   | Survivor     | 0.28 | 17   | 402    | 68   | 462 | 446     | 14   | 43    | 6.3  | 75.4       | 11.3     | 13.2       | Other               |
| 194 | 65   | 3   | Survivor     | 0.22 | 14   | 496    | 34   | 628 | 463     | 14   | 44    | 5.3  | 75.0       | 13.1     | 11.8       | Other               |
| 195 | 66   | 1   | Survivor     | 0.11 | 38   | 473    | 73   | 207 | 963     | 14   | 45    | 6.0  | 66.3       | 14.1     | 19.5       | Other               |
| 196 | 66   | 2   | Survivor     | 0.11 | 11   | 467    | 74   | 203 | 975     | 15   | 46    | 4.4  | 72.2       | 14.9     | 12.8       | Other               |
| 197 | 66   | 3   | Survivor     | 0.06 | 13   | 537    | 85   | 220 | 989     | 15   | 47    | 5.8  | 64.9       | 16.5     | 18.4       | Other               |
| 198 | 67   | 1   | Survivor     | 0.09 | 62   | 747    | 116  | 282 | 793     | 12   | 38    | 6.8  | 77.3       | 9.4      | 13.1       | Other               |
| 199 | 67   | 2   | Survivor     | 0.09 | 34   | 747    | 110  | 284 | 642     | 12   | 37    | 6.8  | 74.2       | 9.4      | 16.3       | Other               |
| 200 | 67   | 3   | Survivor     | 0.06 | 24   | 525    | 105  | 358 | 613     | 12   | 36    | 7.1  | 71.2       | 9.7      | 18.9       | Other               |

| Table S1 - cont'd |      |     |              |      |      |          |      |     |         |    |       |      |            |          |            |                     |
|-------------------|------|-----|--------------|------|------|----------|------|-----|---------|----|-------|------|------------|----------|------------|---------------------|
| Obs               | ID # | Day | Outcome      | PCT  | IL-6 | Ferritin | C-RP | LDH | D-Dimer | Hb | Hemat | WBC  | Neutrophil | Monocyte | Lymphocyte | Protective profiles |
| 201               | 68   | 1   | Survivor     | 0.18 | 84   | 164      | 49   | 611 | 2426    | 11 | 35    | 6.1  | 81.5       | 8.7      | 9.7        | Other               |
| 202               | 68   | 2   | Survivor     | 0.26 | 148  | 155      | 105  | 607 | 2195    | 13 | 39    | 6.1  | 77.2       | 9.1      | 13.5       | Other               |
| 203               | 68   | 3   | Survivor     | 0.40 | 215  | 125      | 51   | 245 | 3406    | 11 | 34    | 5.2  | 79.3       | 9.3      | 11.2       | Other               |
| 204               | 69   | 1   | Survivor     | 0.41 | 18   | 372      | 199  | 343 | 338     | 13 | 41    | 7.4  | 77.8       | 10.1     | 12.0       | Other               |
| 205               | 69   | 2   | Survivor     | 0.59 | 5    | 360      | 193  | 304 | 241     | 13 | 39    | 7.6  | 89.9       | 4.8      | 5.2        | Other               |
| 206               | 69   | 3   | Survivor     | 0.06 | 5    | 61       | 126  | 228 | 289     | 12 | 38    | 8.0  | 79.8       | 10.4     | 9.7        | Other               |
| 207               | 70   | 1   | Survivor     | 0.10 | 76   | 1616     | 131  | 292 | 1486    | 13 | 40    | 4.0  | 76.9       | 5.4      | 17.6       | Other               |
| 208               | 70   | 2   | Survivor     | 0.09 | 71   | 1988     | 133  | 363 | 1483    | 13 | 43    | 5.1  | 64.9       | 7.3      | 27.6       | Other               |
| 209               | 70   | 3   | Survivor     | 0.08 | 18   | 1303     | 56   | 434 | 566     | 13 | 41    | 6.9  | 74.1       | 7.1      | 18.6       | Other               |
| 210               | 71   | 1   | Survivor     | 0.12 | 32   | 1034     | 90   | 268 | 647     | 13 | 37    | 5.3  | 72.8       | 4.9      | 22.1       | Other               |
| 211               | 71   | 2   | Survivor     | 0.10 | 3    | 789      | 84   | 322 | 283     | 12 | 36    | 7.3  | 61.2       | 8.9      | 29.8       | Other               |
| 212               | 71   | 3   | Survivor     | 0.06 | 3    | 1372     | 62   | 251 | 220     | 12 | 37    | 8.6  | 58.5       | 10.1     | 31.2       | Other               |
| 213               | 72   | 1   | Survivor     | 0.08 | 11   | 80       | 22   | 179 | 784     | 9  | 29    | 4.0  | 64.6       | 9.1      | 26.2       | Other               |
| 214               | 72   | 2   | Survivor     | 0.06 | 7    | 80       | 14   | 171 | 1001    | 9  | 28    | 4.4  | 63.0       | 10.1     | 26.8       | Other               |
| 215               | 72   | 3   | Survivor     | 0.06 | 6    | 71       | 13   | 179 | 1057    | 8  | 27    | 4.9  | 60.5       | 9.1      | 30.3       | Other               |
| 216               | 73   | 1   | Survivor     | 0.24 | 67   | 260      | 95   | 292 | 633     | 12 | 36    | 8.7  | 78.0       | 6.4      | 15.5       | Other               |
| 217               | 73   | 2   | Survivor     | 0.21 | 67   | 360      | 115  | 416 | 535     | 13 | 40    | 8.8  | 80.7       | 3.0      | 16.1       | Other               |
| 218               | 73   | 3   | Survivor     | 0.13 | 30   | 358      | 54   | 286 | 475     | 13 | 40    | 10.3 | 73.9       | 11.3     | 14.6       | Other               |
| 219               | 74   | 1   | Survivor     | 0.08 | 39   | 93       | 231  | 148 | 473     | 11 | 36    | 5.9  | 55.0       | 10.2     | 34.7       | Other               |
| 220               | 74   | 2   | Survivor     | 0.06 | 19   | 88       | 199  | 212 | 500     | 11 | 35    | 6.3  | 52.7       | 8.3      | 38.8       | III                 |
| 221               | 74   | 3   | Survivor     | 0.06 | 15   | 83       | 97   | 141 | 559     | 11 | 35    | 6.9  | 51.7       | 8.6      | 39.6       | III                 |
| 222               | 75   | 1   | Survivor     | 0.06 | 20   | 219      | 21   | 253 | 796     | 11 | 35    | 3.6  | 64.7       | 7.2      | 27.9       | Other               |
| 223               | 75   | 2   | Survivor     | 0.06 | 31   | 219      | 37   | 249 | 784     | 12 | 39    | 4.3  | 61.5       | 7.5      | 30.8       | Other               |
| 224               | 75   | 3   | Survivor     | 0.06 | 18   | 200      | 44   | 265 | 774     | 12 | 36    | 4.0  | 62.7       | 7.6      | 29.5       | Other               |
| 225               | 76   | 1   | Survivor     | 0.28 | 233  | 702      | 22   | 177 | 1486    | 15 | 45    | 12.0 | 79.8       | 10.2     | 9.8        | Other               |
| 226               | 76   | 2   | Survivor     | 0.28 | 200  | 830      | 24   | 212 | 1794    | 13 | 39    | 7.2  | 79.0       | 7.4      | 13.4       | Other               |
| 227               | 76   | 3   | Survivor     | 1.44 | 200  | 2094     | 33   | 248 | 3508    | 12 | 35    | 5.3  | 68.1       | 12.9     | 18.8       | Other               |
| 228               | 77   | 1   | Survivor     | 0.06 | 5    | 411      | 41   | 202 | 1287    | 15 | 44    | 4.6  | 74.6       | 7.2      | 18.0       | Other               |
| 229               | 78   | 1   | Survivor     | 0.09 | 13   | 759      | 55   | 273 | 405     | 15 | 45    | 7.3  | 82.9       | 7.7      | 9.3        | Other               |
| 230               | 78   | 2   | Survivor     | 0.08 | 13   | 862      | 53   | 316 | 344     | 15 | 44    | 8.6  | 79.4       | 10.1     | 10.4       | Other               |
| 231               | 78   | 3   | Survivor     | 0.06 | 2    | 743      | 42   | 246 | 395     | 15 | 43    | 8.9  | 77.3       | 9.6      | 13.0       | Other               |
| 232               | 79   | 1   | Survivor     | 1.22 | 88   | 1427     | 136  | 477 | 746     | 11 | 33    | 6.1  | 76.7       | 9.5      | 13.7       | Other               |
| 233               | 79   | 2   | Survivor     | 1.73 | 88   | 1484     | 122  | 426 | 526     | 11 | 34    | 8.9  | 82.5       | 7.5      | 9.9        | Other               |
| 234               | 79   | 3   | Survivor     | 1.05 | 6    | 1141     | 85   | 655 | 382     | 11 | 36    | 8.4  | 77.7       | 8.6      | 13.5       | Other               |
| 235               | 80   | 1   | Survivor     | 0.13 | 29   | 298      | 67   | 170 | 869     | 13 | 40    | 9.0  | 69.7       | 7.2      | 23.0       | Other               |
| 236               | 80   | 2   | Survivor     | 0.13 | 29   | 298      | 6    | 170 | 888     | 13 | 40    | 6.9  | 62.0       | 8.8      | 29.1       | Other               |
| 237               | 80   | 3   | Survivor     | 0.06 | 3    | 331      | 77   | 168 | 432     | 13 | 40    | 6.8  | 67.4       | 9.3      | 23.2       | Other               |
| 238               | 81   | 1   | Survivor     | 0.08 | 8    | 306      | 3    | 190 | 294     | 14 | 42    | 9.1  | 46.0       | 11.0     | 42.8       | III                 |
| 239               | 81   | 2   | Survivor     | 0.06 | 5    | 324      | 3    | 189 | 258     | 14 | 41    | 9.1  | 49.0       | 9.7      | 41.1       | III                 |
| 230               | 81   | 3   | Survivor     | 0.06 | 7    | 417      | 3    | 198 | 220     | 14 | 41    | 9.2  | 50.4       | 9.7      | 39.8       | III                 |
| 241               | 82   | 1   | Survivor     | 0.11 | 852  | 2923     | 72   | 509 | 2962    | 14 | 43    | 12.2 | 86.8       | 6.8      | 6.3        | Other               |
| 242               | 82   | 2   | Survivor     | 0.10 | 297  | 2273     | 69   | 417 | 1407    | 13 | 39    | 9.4  | 84.9       | 8.8      | 6.2        | Other               |
| 243               | 82   | 3   | Survivor     | 0.09 | 1480 | 1724     | 60   | 427 | 1402    | 13 | 41    | 11.9 | 86.2       | 5.4      | 8.2        | Other               |
| 244               | 83   | 1   | Non-survivor | 0.15 | 59   | 612      | 89   | 256 | 667     | 11 | 37    | 6.2  | 70.6       | 7.5      | 21.7       | Other               |
| 245               | 83   | 2   | Non-survivor | 0.14 | 11   | 684      | 94   | 272 | 515     | 10 | 33    | 3.8  | 60.5       | 7.4      | 32.0       | Other               |
| 246               | 83   | 3   | Non-survivor | 0.25 | 35   | 512      | 41   | 362 | 326     | 12 | 38    | 4.2  | 69.3       | 6.5      | 24.0       | Other               |
| 247               | 84   | 1   | Non-survivor | 0.16 | 16   | 420      | 16   | 432 | 707     | 12 | 37    | 2.9  | 85.8       | 6.9      | 7.2        | Other               |
| 248               | 84   | 2   | Non-survivor | 0.11 | 9    | 721      | 9    | 628 | 544     | 13 | 40    | 3.9  | 85.7       | 8.2      | 5.9        | Other               |
| 249               | 84   | 3   | Non-survivor | 0.07 | 19   | 616      | 6    | 689 | 758     | 13 | 40    | 4.2  | 88.2       | 5.7      | 6.0        | Other               |
| 250               | 85   | 1   | Survivor     | 0.47 | 73   | 313      | 188  | 549 | 954     | 14 | 42    | 6.0  | 90.5       | 2.0      | 7.4        | II                  |

| Table S1 - cont'd |      |             |              |      |      |        |          |     |             |    |       |     |            |          |            |                        |
|-------------------|------|-------------|--------------|------|------|--------|----------|-----|-------------|----|-------|-----|------------|----------|------------|------------------------|
| Obs               | ID # | D<br>a<br>y | Outcome      | PCT  | IL-6 | Ferrit | C-<br>RP | LDH | D-<br>Dimer | Hb | Hemat | WBC | Neutrophil | Monocyte | Lymphocyte | Protective<br>profiles |
| 251               | 85   | 2           | Survivor     | 0.25 | 73   | 271    | 181      | 514 | 1204        | 14 | 40    | 4.0 | 89.5       | 2.7      | 7.7        | Other                  |
| 252               | 85   | 3           | Survivor     | 0.25 | 52   | 194    | 42       | 370 | 696         | 13 | 37    | 5.3 | 81.5       | 6.7      | 11.7       | Other                  |
| 253               | 86   | 1           | Survivor     | 0.07 | 3    | 368    | 46       | 424 | 337         | 13 | 40    | 5.3 | 58.6       | 8.0      | 33.2       | Other                  |
| 254               | 86   | 2           | Survivor     | 0.06 | 3    | 291    | 52       | 293 | 313         | 13 | 40    | 4.6 | 73.9       | 5.4      | 20.5       | Other                  |
| 255               | 86   | 3           | Survivor     | 0.00 | 3    | 207    | 71       | 200 | 341         | 12 | 39    | 6.5 | 48.3       | 10.1     | 41.4       | III                    |
| 256               | 87   | 1           | Survivor     | 0.06 | 10   | 526    | 55       | 222 | *           | 13 | 39    | 6.2 | 81.9       | 8.7      | 9.2        | Other                  |
| 257               | 87   | 2           | Survivor     | 0.06 | 9    | 423    | 70       | 220 | *           | 13 | 39    | 5.5 | 83.4       | 2.8      | 13.6       | Other                  |
| 258               | 87   | 3           | Survivor     | 0.06 | 0    | 451    | 61       | 220 | *           | 13 | 40    | 5.0 | 73.5       | 1.2      | 25.2       | II                     |
| 259               | 88   | 1           | Survivor     | 0.36 | 67   | 4157   | 193      | 424 | 2767        | 9  | 29    | 7.9 | 93.4       | 2.2      | 4.3        | II                     |
| 260               | 88   | 2           | Survivor     | 0.44 | 7    | 2101   | 125      | 395 | 14595       | 10 | 32    | 7.2 | 96.6       | 1.1      | 2.2        | II                     |
| 261               | 88   | 3           | Survivor     | 0.44 | 5    | 991    | 31       | 223 | 1278        | 8  | 27    | 2.2 | 93.1       | 2.7      | 4.1        | Other                  |
| 262               | 89   | 1           | Non-survivor | 0.07 | *    | *      | 6        | *   | *           | 10 | 33    | 6.5 | 68.9       | 10.1     | 20.9       | Other                  |
| 263               | 90   | 1           | Non-survivor | 0.80 | *    | 2678   | 116      | *   | 964         | 14 | 35    | 6.5 | 75.7       | 12.8     | 11.4       | Other                  |
| 264               | 90   | 2           | Non-survivor | 0.88 | *    | 3800   | 257      | *   | 1227        | 13 | 41    | 3.7 | 76.6       | 9.3      | 14.0       | Other                  |
| 265               | 90   | 3           | Non-survivor | 0.80 | *    | 2876   | 300      | *   | 2647        | 11 | 36    | 3.7 | 69.7       | 9.0      | 21.1       | Other                  |
| 266               | 91   | 1           | Survivor     | 0.16 | *    | *      | 59       | *   | *           | 12 | 42    | 4.1 | 54.4       | 10.1     | 35.4       | Other                  |
| 267               | 91   | 2           | Survivor     | 0.19 | *    | *      | 13       | *   | *           | 12 | 42    | 4.7 | 58.4       | 9.4      | 32.0       | Other                  |
| 268               | 91   | 3           | Survivor     | 0.12 | *    | *      | 8        | *   | *           | 11 | 40    | 5.2 | 64.7       | 8.4      | 26.8       | Other                  |
| 269               | 92   | 1           | Survivor     | *    | *    | 140    | 3        | *   | *           | 16 | 48    | 4.4 | 60.9       | 20.4     | 18.6       | Other                  |
| 270               | 93   | 1           | Non-survivor | 0.21 | 152  | 487    | 37       | 561 | 870         | 12 | 38    | 3.1 | 72.3       | 8.0      | 19.5       | Other                  |
| 271               | 94   | 1           | Survivor     | 0.06 | *    | *      | 57       | *   | *           | 14 | 42    | 4.3 | 43.4       | 20.0     | 36.4       | III                    |
| 272               | 94   | 2           | Survivor     | 0.06 | *    | *      | 88       | *   | *           | 13 | 38    | 3.9 | 59.3       | 11.7     | 28.8       | Other                  |
| 273               | 94   | 3           | Survivor     | 0.06 | *    | *      | 60       | *   | *           | 13 | 37    | 4.0 | 49.1       | 17.9     | 32.8       | III                    |
| 274               | 95   | 1           | Survivor     | *    | 0    | 202    | 1        | *   | *           | 14 | 42    | 6.3 | 59.9       | 14.0     | 26.0       | Other                  |
| 275               | 95   | 2           | Survivor     | *    | *    | *      | *        | *   | *           | 12 | 37    | 5.5 | 61.6       | 11.4     | 26.8       | Other                  |
| 276               | 96   | 1           | Survivor     | 0.15 | 29   | 524    | 131      | *   | *           | 15 | 48    | 4.3 | 78.3       | 9.5      | 12.0       | Other                  |
| 277               | 96   | 2           | Survivor     | 0.14 | 58   | 434    | 160      | *   | *           | 15 | 48    | 5.0 | 78.0       | 9.9      | 11.9       | Other                  |
| 278               | 96   | 3           | Survivor     | *    | *    | 420    | 158      | *   | *           | 15 | 48    | 5.4 | 78.0       | 9.5      | 12.3       | Other                  |
| 279               | 97   | 1           | Survivor     | *    | *    | *      | *        | *   | *           | 12 | 35    | 4.8 | 71.4       | 8.6      | 19.9       | Other                  |
| 280               | 98   | 1           | Survivor     | *    | *    | *      | *        | *   | *           | 13 | 40    | 6.2 | 54.0       | 13.7     | 32.1       | Other                  |
| 281               | 98   | 2           | Survivor     | *    | *    | *      | *        | *   | *           | 13 | 39    | 6.7 | 52.70      | 11.9     | 35.3       | Other                  |
| 282               | 99   | 1           | Survivor     | *    | *    | *      | *        | *   | *           | 12 | 39    | 7.1 | 66.9       | 6.6      | 26.4       | Other                  |
| 283               | 100  | 1           | Survivor     | 0.13 | 29   | 298    | 77       | 477 | 423         | 13 | 41    | 8.6 | 89.1       | 1.9      | 8.8        | II                     |
| 284               | 100  | 2           | Survivor     | 0.13 | 29   | 331    | 102      | 648 | 522         | 14 | 41    | 7.7 | 88.4       | 3.5      | 7.9        | Other                  |
| 285               | 100  | 3           | Survivor     | 0.00 | 20   | 404    | 103      | 691 | 477         | 13 | 39    | 7.4 | 88.6       | 2.3      | 8.9        | Other                  |
| 286               | 101  | 1           | Survivor     | 0.06 | 6    | 263    | 32       | 239 | 865         | 14 | 43    | 6.5 | 66.5       | 7.5      | 25.8       | Other                  |
| 287               | 101  | 2           | Survivor     | 0.06 | 4    | 263    | 19       | 206 | 286         | 14 | 41    | 8.9 | 78.8       | 7.9      | 13.1       | Other                  |
| 288               | 101  | 3           | Survivor     | 0.06 | 9    | 164    | 12       | 199 | 155         | 13 | 39    | 5.9 | 78.4       | 8.2      | 13.2       | Other                  |
| 289               | 103  | 1           | Survivor     | 0.71 | 170  | 4231   | 110      | 632 | 1253        | 12 | 36    | 6.2 | 89.1       | 1.9      | 8.8        | II                     |
| 290               | 103  | 2           | Survivor     | 0.42 | 170  | 4199   | 83       | 523 | 1407        | 11 | 34    | 5.5 | 88.5       | 3.5      | 7.9        | Other                  |
| 291               | 103  | 3           | Survivor     | 0.14 | 223  | 3846   | 61       | 632 | 1354        | 12 | 34    | 8.5 | 88.6       | 2.3      | 8.9        | Other                  |

**Table S2**

| <b>Table S2. Temporal assessments of L-shaped distributions</b>     |                 |              |             |               |                 |
|---------------------------------------------------------------------|-----------------|--------------|-------------|---------------|-----------------|
| <b>A- Day 1 assessment of simple and complex indicators (n=101)</b> |                 |              |             |               |                 |
| <b>Variable</b>                                                     | <b>Outcome*</b> | <b>Count</b> | <b>Mean</b> | <b>Median</b> | <b>Kurtosis</b> |
| Lymphocyte %                                                        | NS              | 13           | 12.53       | 12.07         | -1.19           |
| Lymphocyte %                                                        | S               | 88           | 17.19       | 16.32         | 0.13            |
| Neutrophil %                                                        | NS              | 13           | 81.05       | 81.14         | -1.14           |
| Neutrophil %                                                        | S               | 88           | 74.36       | 76.76         | 0.08            |
| Monocyte %                                                          | NS              | 13           | 6.421       | 6.405         | 0.49            |
| Monocyte %                                                          | S               | 88           | 8.451       | 7.893         | 0.68            |
| LDH                                                                 | NS              | 13           | 528.9       | 432.0         | 1.30            |
| LDH                                                                 | S               | 88           | 336.2       | 305.0         | -0.08           |
| PCT                                                                 | NS              | 13           | 0.375       | 0.210         | 0.73            |
| PCT                                                                 | S               | 88           | 0.637       | 0.130         | 72.67           |
| Ferritin                                                            | NS              | 13           | 1077        | 644           | -0.10           |
| Ferritin                                                            | S               | 88           | 673.4       | 459.0         | 8.90            |
| Hb                                                                  | NS              | 13           | 12.762      | 12.600        | 0.20            |
| Hb                                                                  | S               | 88           | 29.5        | 13.5          | 87.97           |
| MCH                                                                 | NS              | 13           | 30.638      | 30.200        | 2.72            |
| MCH                                                                 | S               | 88           | 29.991      | 29.600        | 68.55           |
| RDW CV                                                              | NS              | 13           | 13.831      | 14.000        | -0.52           |
| RDW CV                                                              | S               | 88           | 13.217      | 13.000        | 22.08           |
| Hematocrit                                                          | NS              | 13           | 38.12       | 37.30         | 0.36            |
| Hematocrit                                                          | S               | 88           | 44.00       | 41.50         | 84.75           |
| IL-6                                                                | NS              | 13           | 168.9       | 97.0          | -0.29           |
| IL-6                                                                | S               | 88           | 121.6       | 38.0          | 61.75           |
| <i>AAT</i>                                                          | NS              | 13           | 0.02376     | 0.01365       | -0.54           |
| <i>AAT</i>                                                          | S               | 88           | 0.0680      | 0.0320        | 16.89           |
| <i>BBS</i>                                                          | NS              | 13           | 2233        | 752           | 8.64            |
| <i>BBS</i>                                                          | S               | 88           | 1252        | 177           | 25.24           |

| <b>Table S2 - cont'd</b>                                                   |                 |              |             |               |                 |
|----------------------------------------------------------------------------|-----------------|--------------|-------------|---------------|-----------------|
| <b>B. Longitudinal assessment of simple and complex indicators (n=291)</b> |                 |              |             |               |                 |
| <b>Variable</b>                                                            | <b>Outcome*</b> | <b>Count</b> | <b>Mean</b> | <b>Median</b> | <b>Kurtosis</b> |
| Lymphocyte %                                                               | NS              | 37           | 12.61       | 12.30         | 0.76            |
| Lymphocyte %                                                               | S               | 254          | 18.454      | 17.215        | -0.36           |
| Neutrophil %                                                               | NS              | 37           | 81.45       | 82.51         | -0.21           |
| Neutrophil %                                                               | S               | 254          | 72.981      | 74.475        | -0.56           |
| Monocyte %                                                                 | NS              | 37           | 5.938       | 5.332         | 0.01            |
| Monocyte %                                                                 | S               | 254          | 8.565       | 8.270         | 1.22            |
| LDH                                                                        | NS              | 37           | 552.4       | 459.0         | -0.58           |
| LDH                                                                        | S               | 254          | 330.16      | 303.00        | 0.51            |
| PCT                                                                        | NS              | 37           | 0.4398      | 0.20          | 2.29            |
| PCT                                                                        | S               | 254          | 0.506       | 0.13          | 89.01           |
| Ferritin                                                                   | NS              | 37           | 1101        | 690           | 0.58            |
| Ferritin                                                                   | S               | 254          | 660.2       | 465.5         | 8.67            |
| Hb                                                                         | NS              | 37           | 12.392      | 12.200        | 0.08            |
| Hb                                                                         | S               | 254          | 18.57       | 13.30         | 253.78          |
| MCH                                                                        | NS              | 37           | 30.584      | 30.200        | 1.24            |
| MCH                                                                        | S               | 254          | 29.913      | 29.450        | 57.89           |
| RDW CV                                                                     | NS              | 37           | 13.889      | 14.000        | -0.91           |
| RDW CV                                                                     | S               | 254          | 13.304      | 13.100        | 21.68           |
| Hematocrit                                                                 | NS              | 37           | 37.424      | 37.300        | 0.42            |
| Hematocrit                                                                 | S               | 254          | 40.65       | 40.10         | 223.02          |
| IL-6                                                                       | NS              | 37           | 410         | 66            | 12.43           |
| IL-6                                                                       | S               | 254          | 103.8       | 25            | 74.27           |
| <i>AAT</i>                                                                 | NS              | 37           | 0.02360     | 0.01328       | 0.48            |
| <i>AAT</i>                                                                 | S               | 254          | 0.07276     | 0.03681       | 13.41           |
| <i>BBS</i>                                                                 | NS              | 37           | 3213        | 752           | 7.35            |
| <i>BBS</i>                                                                 | S               | 254          | 1455        | 144           | 184.52          |



| <b>Table S2 - cont'd</b>                                                   |                 |              |             |               |                 |
|----------------------------------------------------------------------------|-----------------|--------------|-------------|---------------|-----------------|
| <b>C. Dynamics-related kurtosis (day 2 minus day 1 values, n=92 pairs)</b> |                 |              |             |               |                 |
| <b>Variable</b>                                                            | <b>Outcome*</b> | <b>Count</b> | <b>Mean</b> | <b>Median</b> | <b>Kurtosis</b> |
| Net d2-d1 L %                                                              | NS              | 11           | 2.72        | 1.27          | 1.84            |
| Net d2-d1 L %                                                              | S               | 81           | 2.277       | 1.604         | 3.58            |
| Net d2-d1 N %                                                              | NS              | 11           | -2.51       | -0.10         | 1.69            |
| Net d2-d1 N %                                                              | S               | 81           | -2.284      | -1.375        | 1.74            |
| Net d2-d1 M %                                                              | NS              | 11           | -0.210      | -0.121        | 0.13            |
| Net d2-d1 M %                                                              | S               | 81           | 0.007       | 0.207         | 1.52            |
| Net d2-d1PCT                                                               | NS              | 11           | 0.074       | -0.010        | 3.10            |
| Net d2-d1PCT                                                               | S               | 81           | -0.144      | 0.000         | 41.35           |
| Net d2-d1 Hb                                                               | NS              | 11           | -0.555      | -0.600        | -0.44           |
| Net d2-d1 Hb                                                               | S               | 81           | -18.0       | -0.5          | 80.99           |
| Net d2-d1 Hematocrit                                                       | NS              | 11           | -0.83       | -1.7          | -0.90           |
| Net d2-d1 Hematocrit                                                       | S               | 81           | -5.31       | -1.0          | 80.08           |
| Net d2-d1 IL-6                                                             | NS              | 10           | 38.4        | 0             | 8.37            |
| Net d2-d1 IL-6                                                             | S               | 81           | -27.5       | 0             | 34.41           |
| Net d2-d1AAT                                                               | NS              | 11           | 0.00780     | 0.00276       | 3.39            |
| Net d2-d1AAT                                                               | S               | 81           | 0.00567     | 0.00255       | 18.37           |
| Net d2-d1BBF                                                               | NS              | 11           | 0.00647     | 0.00000       | 4.81            |
| Net d2-d1BBF                                                               | S               | 81           | 0.00376     | 0.00036       | 19.14           |
| Net d2-d1BBT                                                               | NS              | 11           | 0.000773    | 0.000015      | 4.34            |
| Net d2-d1BBT                                                               | S               | 81           | -0.00019    | 0.00002       | 29.69           |
| Net d2-d1BAS                                                               | NS              | 11           | 3.1         | -12.6         | 7.87            |
| Net d2-d1BAS                                                               | S               | 81           | -3.5        | -2.0          | 35.84           |
| Net d2-d1[L/M]/ [N/L]                                                      | NS              | 11           | .344        | .044          | 2.5             |
| Net d2-d1[L/M]/ [N/L]                                                      | S               | 81           | .271        | .095          | 24.65           |
